# Supplementary material for: The Epidemiology of Bloodstream Infections and Antimicrobial Susceptibility Patterns: A Nine-Year Retrospective Study at St. Dominic Hospital, Akwatia, Ghana
Source: PubMed Central journal article supplement (PMC6770298; doi:10.1155/2019/6750864), 2019-09-19
Supplement: 6750864.f1.pdf [file 6750864.f1.pdf]

1 *Table 4A: Antimicrobial susceptibility pattern of bacteria isolates from blood culture at the St. Dominic Hospital in Akwatia*

| Bacteria isolate  | Pattern | PENICILLINS |             |             |             |             |             |             |             |            |
|-------------------|---------|-------------|-------------|-------------|-------------|-------------|-------------|-------------|-------------|------------|
|                   |         | COX<br>n(%) | AMX<br>n(%) | PEN<br>n(%) | AMP<br>n(%) | TZP<br>n(%) | AUG<br>n(%) | FLX<br>n(%) | CXC<br>n(%) | AS<br>n(%) |
| S. aureus         | S       | 3(100.0)    | 0(0.0)      | 1(0.6)      | 6(3.7)      | 0(0.0)      | 78(81.3)    | 11(17.7)    | 17(9.1)     | 0(0.0)     |
|                   | I       | 0(0.0)      | 0(0.0)      | 1(0.6)      | 0(0.0)      | 0(0.0)      | 0(0.0)      | 2(3.2)      | 2(1.1)      | 0(0.0)     |
|                   | R       | 0(0.0)      | 0(0.0)      | 158(98.8)   | 157(96.3)   | 0(0.0)      | 18(18.8)    | 49(79.0)    | 167(89.8)   | 0(0.0)     |
| E. coli           | S       | 0(0.0)      | 0(0.0)      | 0(0.0)      | 1(2.6)      | 4(33.3)     | 2(40.0)     | 0(0.0)      | 0(0.0)      | 3(25.0)    |
|                   | I       | 0(0.0)      | 0(0.0)      | 0(0.0)      | 0(0.0)      | 0(0.0)      | 0(0.0)      | 0(0.0)      | 0(0.0)      | 0(0.0)     |
|                   | R       | 1(100.0)    | 0(0.0)      | 1(100.0)    | 38(97.4)    | 8(66.7)     | 3(60.0)     | 1(100.0)    | 0(0.0)      | 9(75.0)    |
| P. aeruginosa     | S       | 0(0.0)      | 0(0.0)      | 0(0.0)      | 0(0.0)      | 0(0.0)      | 0(0.0)      | 0(0.0)      | 0(0.0)      | 1(33.3)    |
|                   | I       | 0(0.0)      | 0(0.0)      | 0(0.0)      | 0(0.0)      | 0(0.0)      | 0(0.0)      | 0(0.0)      | 0(0.0)      | 0(0.0)     |
|                   | R       | 0(0.0)      | 0(0.0)      | 0(0.0)      | 0(0.0)      | 1(100.0)    | 0(0.0)      | 0(0.0)      | 0(0.0)      | 2(66.7)    |
| Streptococcus spp | S       | 1(100.0)    | 0(0.0)      | 2(7.7)      | 4(15.4)     | 0(0.0)      | 14(77.8)    | 2(15.4)     | 7(41.2)     | 0(0.0)     |
|                   | I       | 0(0.0)      | 0(0.0)      | 0(0.0)      | 0(0.0)      | 0(0.0)      | 0(0.0)      | 0(0.0)      | 0(0.0)      | 0(0.0)     |
|                   | R       | 0(0.0)      | 0(0.0)      | 24(92.3)    | 22(84.6)    | 0(0.0)      | 4(22.2)     | 11(84.6)    | 10(58.8)    | 0(0.0)     |
| Klebsiella spp    | S       | 0(0.0)      | 0(0.0)      | 0(0.0)      | 1(1.8)      | 2(28.6)     | 5(33.3)     | 0(0.0)      | 0(0.0)      | 0(0.0)     |
|                   | I       | 0(0.0)      | 0(0.0)      | 0(0.0)      | 0(0.0)      | 0(0.0)      | 0(0.0)      | 0(0.0)      | 0(0.0)      | 0(0.0)     |
|                   | R       | 0(0.0)      | 0(0.0)      | 1(100.0)    | 56(98.2)    | 5(71.4)     | 10(66.7)    | 0(0.0)      | 2(100.0)    | 7(100.0)   |
| Shigella spp      | S       | 0(0.0)      | 0(0.0)      | 0(0.0)      | 0(0.0)      | 0(0.0)      | 0(0.0)      | 0(0.0)      | 0(0.0)      | 0(0.0)     |
|                   | I       | 0(0.0)      | 0(0.0)      | 0(0.0)      | 0(0.0)      | 0(0.0)      | 0(0.0)      | 0(0.0)      | 0(0.0)      | 0(0.0)     |
|                   | R       | 0(0.0)      | 0(0.0)      | 0(0.0)      | 1(100.0)    | 0(0.0)      | 0(0.0)      | 0(0.0)      | 0(0.0)      | 0(0.0)     |
| Enterobacter      | S       | 0(0.0)      | 0(0.0)      | 0(0.0)      | 0(0.0)      | 0(0.0)      | 6(54.5)     | 0(0.0)      | 0(0.0)      | 0(0.0)     |
|                   | I       | 0(0.0)      | 0(0.0)      | 0(0.0)      | 0(0.0)      | 0(0.0)      | 0(0.0)      | 0(0.0)      | 0(0.0)      | 0(0.0)     |
|                   | R       | 0(0.0)      | 0(0.0)      | 0(0.0)      | 23(100.0)   | 0(0.0)      | 5(45.5)     | 0(0.0)      | 4(100.0)    | 0(0.0)     |
| Enterococcus      | S       | 0(0.0)      | 0(0.0)      | 0(0.0)      | 0(0.0)      | 0(0.0)      | 2(66.7)     | 0(0.0)      | 0(0.0)      | 0(0.0)     |
|                   | I       | 0(0.0)      | 0(0.0)      | 0(0.0)      | 0(0.0)      | 0(0.0)      | 0(0.0)      | 0(0.0)      | 0(0.0)      | 0(0.0)     |
|                   | R       | 0(0.0)      | 0(0.0)      | 3(100.0)    | 3(100.0)    | 0(0.0)      | 1(33.3)     | 2(100.0)    | 2(100.0)    | 0(0.0)     |
| Micrococcus       | S       | 0(0.0)      | 0(0.0)      | 0(0.0)      | 0(0.0)      | 0(0.0)      | 0(0.0)      | 0(0.0)      | 0(0.0)      | 0(0.0)     |
|                   | I       | 0(0.0)      | 0(0.0)      | 0(0.0)      | 0(0.0)      | 0(0.0)      | 0(0.0)      | 0(0.0)      | 0(0.0)      | 0(0.0)     |
|                   | R       | 0(0.0)      | 0(0.0)      | 0(0.0)      | 0(0.0)      | 0(0.0)      | 0(0.0)      | 0(0.0)      | 0(0.0)      | 0(0.0)     |
| CoNS              | S       | 6(100.0)    | 0(0.0)      | 3(2.1)      | 16(10.6)    | 0(0.0)      | 139(89.7)   | 30(33.7)    | 4(4.5)      | 0(0.0)     |
|                   | I       | 0(0.0)      | 0(0.0)      | 0(0.0)      | 0(0.0)      | 0(0.0)      | 1(0.6)      | 0(0.0)      | 0(0.0)      | 0(0.0)     |
|                   | R       | 0(0.0)      | 6(100.0)    | 137(97.9)   | 135(89.4)   | 0(0.0)      | 15(9.7)     | 59(66.3)    | 84(95.5)    | 0(0.0)     |
| Salmonella spp    | S       | 0(0.0)      | 0(0.0)      | 0(0.0)      | 1(3.1)      | 0(0.0)      | 9(69.2)     | 0(0.0)      | 0(0.0)      | 0(0.0)     |
|                   | I       | 0(0.0)      | 0(0.0)      | 0(0.0)      | 0(0.0)      | 0(0.0)      | 0(0.0)      | 0(0.0)      | 0(0.0)      | 0(0.0)     |
|                   | R       | 0(0.0)      | 0(0.0)      | 0(0.0)      | 31(96.9)    | 0(0.0)      | 4(30.8)     | 0(0.0)      | 2(100.0)    | 0(0.0)     |

2 Data is presented as figure and percentages in parentheses

3

| Bacteria isolate  | Pattern | Cephalosporins |             |             |             |             |            |             | Macrolides  |             |
|-------------------|---------|----------------|-------------|-------------|-------------|-------------|------------|-------------|-------------|-------------|
|                   |         | CTX<br>n(%)    | CRO<br>n(%) | CTR<br>n(%) | CRX<br>n(%) | CAZ<br>n(%) | CF<br>n(%) | CTL<br>n(%) | ERY<br>n(%) | AZM<br>n(%) |
| S.aureus          | S       | 2(40.0)        | 0(0.0)      | 1(25.0)     | 51(68.0)    | 0(0.0)      | 0(0.0)     | 0(0.0)      | 104(64.2)   | 0(0.0)      |
|                   | I       | 0(0.0)         | 0(0.0)      | 0(0.0)      | 0(0.0)      | 0(0.0)      | 0(0.0)     | 0(0.0)      | 1(0.6)      | 0(0.0)      |
|                   | R       | 3(60.0)        | 0(0.0)      | 3(75.0)     | 24(32.0)    | 0(0.0)      | 0(0.0)     | 0(0.0)      | 57(35.2)    | 0(0.0)      |
| E. coli           | S       | 13(35.1)       | 0(0.0)      | 9(37.5)     | 9(24.3)     | 0(0.0)      | 3(30.0)    | 1(100.0)    | 0(0.0)      | 0(0.0)      |
|                   | I       | 0(0.0)         | 0(0.0)      | 0(0.0)      | 0(0.0)      | 0(0.0)      | 0(0.0)     | 0(0.0)      | 0(0.0)      | 0(0.0)      |
|                   | R       | 24(64.9)       | 0(0.0)      | 15(62.5)    | 28(75.7)    | 0(0.0)      | 7(70.0)    | 0(0.0)      | 1(100.0)    | 0(0.0)      |
| P. aeruginosa     | S       | 2(66.7)        | 0(0.0)      | 0(0.0)      | 0(0.0)      | 3(27.3)     | 0(0.0)     | 0(0.0)      | 0(0.0)      | 0(0.0)      |
|                   | I       | 0(0.0)         | 0(0.0)      | 0(0.0)      | 0(0.0)      | 0(0.0)      | 0(0.0)     | 0(0.0)      | 0(0.0)      | 0(0.0)      |
|                   | R       | 1(33.3)        | 0(0.0)      | 0(0.0)      | 0(0.0)      | 8(72.7)     | 1(100.0)   | 0(0.0)      | 0(0.0)      | 0(0.0)      |
| Streptococcus spp | S       | 1(100.0)       | 0(0.0)      | 4(100.0)    | 15(71.4)    | 1(33.3)     | 0(0.0)     | 0(0.0)      | 14(51.9)    | 0(0.0)      |
|                   | I       | 0(0.0)         | 0(0.0)      | 0(0.0)      | 0(0.0)      | 0(0.0)      | 0(0.0)     | 0(0.0)      | 0(0.0)      | 0(0.0)      |
|                   | R       | 0(0.0)         | 0(0.0)      | 0(0.0)      | 6(28.6)     | 2(66.7)     | 0(0.0)     | 0(0.0)      | 13(48.1)    | 0(0.0)      |
| Klebsiella spp    | S       | 14(26.4)       | 1(100.0)    | 14(31.1)    | 11(20.8)    | 0(0.0)      | 0(0.0)     | 0(0.0)      | 0(0.0)      | 0(0.0)      |
|                   | I       | 0(0.0)         | 0(0.0)      | 0(0.0)      | 0(0.0)      | 0(0.0)      | 0(0.0)     | 0(0.0)      | 0(0.0)      | 0(0.0)      |
|                   | R       | 39(73.6)       | 0(0.0)      | 31(68.9)    | 42(79.2)    | 1(100.0)    | 6(100.0)   | 1(100.0)    | 0(0.0)      | 0(0.0)      |
| Shigella spp      | S       | 0(0.0)         | 0(0.0)      | 0(0.0)      | 0(0.0)      | 0(0.0)      | 0(0.0)     | 0(0.0)      | 0(0.0)      | 0(0.0)      |
|                   | I       | 0(0.0)         | 0(0.0)      | 0(0.0)      | 0(0.0)      | 0(0.0)      | 0(0.0)     | 0(0.0)      | 0(0.0)      | 0(0.0)      |
|                   | R       | 1(100.0)       | 0(0.0)      | 0(0.0)      | 1(100.0)    | 0(0.0)      | 0(0.0)     | 0(0.0)      | 0(0.0)      | 0(0.0)      |
| Enterobacter      | S       | 4(17.4)        | 0(0.0)      | 7(35.0)     | 5(23.8)     | 0(0.0)      | 0(0.0)     | 0(0.0)      | 0(0.0)      | 0(0.0)      |
|                   | I       | 0(0.0)         | 0(0.0)      | 0(0.0)      | 0(0.0)      | 0(0.0)      | 0(0.0)     | 0(0.0)      | 0(0.0)      | 0(0.0)      |
|                   | R       | 19(82.6)       | 0(0.0)      | 13(65.0)    | 16(76.2)    | 0(0.0)      | 0(0.0)     | 0(0.0)      | 0(0.0)      | 0(0.0)      |
| Enterococcus      | S       | 0(0.0)         | 0(0.0)      | 0(0.0)      | 0(0.0)      | 0(0.0)      | 0(0.0)     | 0(0.0)      | 1(50.0)     | 0(0.0)      |
|                   | I       | 0(0.0)         | 0(0.0)      | 0(0.0)      | 0(0.0)      | 0(0.0)      | 0(0.0)     | 0(0.0)      | 0(0.0)      | 0(0.0)      |
|                   | R       | 0(0.0)         | 0(0.0)      | 0(0.0)      | 2(100.0)    | 0(0.0)      | 0(0.0)     | 0(0.0)      | 1(50.0)     | 0(0.0)      |
| Micrococcus       | S       | 0(0.0)         | 0(0.0)      | 0(0.0)      | 0(0.0)      | 0(0.0)      | 0(0.0)     | 0(0.0)      | 0(0.0)      | 0(0.0)      |
|                   | I       | 0(0.0)         | 0(0.0)      | 0(0.0)      | 0(0.0)      | 0(0.0)      | 0(0.0)     | 0(0.0)      | 0(0.0)      | 0(0.0)      |
|                   | R       | 0(0.0)         | 0(0.0)      | 0(0.0)      | 0(0.0)      | 0(0.0)      | 0(0.0)     | 0(0.0)      | 0(0.0)      | 0(0.0)      |
| CoNS              | S       | 5(27.8)        | 0(0.0)      | 5(71.4)     | 82(73.9)    | 0(0.0)      | 0(0.0)     | 0(0.0)      | 83(52.2)    | 5(83.3)     |
|                   | I       | 0(0.0)         | 0(0.0)      | 0(0.0)      | 0(0.0)      | 0(0.0)      | 0(0.0)     | 0(0.0)      | 0(0.0)      | 0(0.0)      |
|                   | R       | 13(72.2)       | 0(0.0)      | 2(28.6)     | 29(26.1)    | 0(0.0)      | 0(0.0)     | 0(0.0)      | 76(47.8)    | 1(16.7)     |
| Salmonella spp    | S       | 32(94.1)       | 0(0.0)      | 21(100.0)   | 27(81.8)    | 0(0.0)      | 0(0.0)     | 0(0.0)      | 0(0.0)      | 0(0.0)      |
|                   | I       | 0(0.0)         | 0(0.0)      | 0(0.0)      | 0(0.0)      | 0(0.0)      | 0(0.0)     | 0(0.0)      | 0(0.0)      | 0(0.0)      |
|                   | R       | 2(5.9)         | 0(0.0)      | 0(0.0)      | 6(18.2)     | 0(0.0)      | 0(0.0)     | 0(0.0)      | 0(0.0)      | 0(0.0)      |
